# Supplementary material for: Evaluation of phytochemical profile, and antioxidant, antidiabetic activities of indigenous Thai fruits
Source: PeerJ. 2024 Jul 12;12:e17681. doi: 10.7717/peerj.17681 (PMC11249001; doi:10.7717/peerj.17681)
Supplement: Data S1 [file peerj-12-17681-s002.xlsx]

## Sheet: HPLC
sample		area			ug / x mg extract			x conc	ug / mg extract			ug / 10 mg extract
takhobpa	4-O-caffeoylquinic acid	79.532	79.937	80.102	219.453	220.6	221.067	30	7.31509	7.35332	7.36889	73.1509	73.5332	736.889
chammaliang	catechin	75.612	77.096	76.137	469.885	478.533	472.944	30	15.6628	15.9511	15.7648	156.628	159.511	1576.48
chan	catechin	30.905	20.947	21.398	209.354	151.324	153.952	30	6.97848	5.04413	5.13174	69.7848	50.4413	513.174
mm	catechin	7.496	7.656	7.746	72.9382	73.8706	74.3951	30	2.43127	2.46235	2.47984	24.3127	24.6235	247.984
takro	catechin	115.947	116.203	117.401	704.937	706.429	713.41	30	23.4979	23.5476	23.7803	234.979	235.476	2378.03
takhob	catechin	12.88	8.553	11.443	104.314	79.0979	95.9394	30	3.47712	2.6366	3.19798	34.7712	26.366	319.798
wa 15	catechin	346.417	347.029	346.233	2048	2051.57	2046.93	30	68.2667	68.3856	68.231	682.667	683.856	6823.1
chammaliang	ellagic acid	6.973	6.873	6.959	0.0393208	0.0178809	0.0363192	30	0.00131069	0.000596029	0.00121064	0.0131069	0.00596029	0.121064
malod	ellagic acid	35.131	34.747	34.67	6.07637	5.99404	5.97753	30	0.202546	0.199801	0.199251	2.02546	1.99801	19.9251
matad	ellagic acid	101.598	102.934	101.833	20.3268	20.6133	20.3772	30	0.677561	0.687109	0.67924	6.77561	6.87109	67.924
gangpla	ellagic acid	230.772	226.894	229.43	48.0216	47.1902	47.7339	30	1.60072	1.57301	1.59113	16.0072	15.7301	159.113
mm	ellagic acid	43.759	43.517	42.554	7.9262	7.87432	7.66785	30	0.264207	0.262477	0.255595	2.64207	2.62477	25.5595
pikul	ellagic acid	30.407	41.04	45.559	5.06355	7.34325	8.31212	30	0.168785	0.244775	0.277071	1.68785	2.44775	27.7071
malod	ellagic acid	35.131	34.747	34.67	6.07637	5.99404	5.97753	30	0.202546	0.199801	0.199251	2.02546	1.99801	19.9251
takhob	ellagic acid	428.869	422.042	427.502	90.4934	89.0297	90.2003	30	3.01645	2.96766	3.00668	30.1645	29.6766	300.668
wa 15	ellagic acid	812.006	811.174	810.178	172.638	172.459	172.246	15	11.5092	11.4973	11.483	115.092	114.973	1148.3
malod	epicatechin	35.326	34.773	34.097	183.223	180.481	177.129	30	6.10742	6.01603	5.90431	61.0742	60.1603	590.431
malod	epicatechin	35.326	34.773	34.097	183.223	180.481	177.129	30	6.10742	6.01603	5.90431	61.0742	60.1603	590.431
takhob	epicatechin	220.262	222.767	218.779	1100.11	1112.53	1092.76	30	36.6703	37.0843	36.4252	366.703	370.843	3642.52
wa 15	epicatechin	1083.35	1099.01	1078.72	5379.15	5456.79	5356.24	15	358.61	363.786	357.083	3586.1	3637.86	35708.3
pikul	epicatechin gallate	19.336	26.158	26.158	45.6206	64.4036	64.4036	30	1.52069	2.14679	2.14679	15.2069	21.4679	214.679
wa 15	epicatechin gallate	1396.74	1391.03	1407.94	3838.04	3822.32	3868.86	15	255.869	254.821	257.924	2558.69	2548.21	25792.4
pikul	epigallocatechin	6.86	6.068	6.929	370.904	328.777	374.574	30	12.3635	10.9592	12.4858	123.635	109.592	1248.58
chammaliang 30	gallic acid	176.636	178.37	177.284	195.42	197.029	196.021	30	6.514	6.56763	6.53404	65.14	65.6763	653.404
malod	gallic acid	32.137	30.975	31.749	61.339	60.2607	60.9789	30	2.04463	2.00869	2.03263	20.4463	20.0869	203.263
gangpla	gallic acid	379.611	382.348	380.452	383.761	386.3	384.541	30	12.792	12.8767	12.818	127.92	128.767	1281.8
khui	gallic acid	35.469	35.75	35.764	64.4307	64.6915	64.7045	30	2.14769	2.15638	2.15682	21.4769	21.5638	215.682
mapud	gallic acid	559.862	558.584	565.974	551.016	549.83	556.687	30	18.3672	18.3277	18.5562	183.672	183.277	1855.62
mm	gallic acid	477.916	478.857	479.448	474.978	475.851	476.4	30	15.8326	15.8617	15.88	158.326	158.617	1588
pikul	gallic acid	696.764	727.624	702.162	678.048	706.683	683.057	30	22.6016	23.5561	22.7686	226.016	235.561	2276.86
malod	gallic acid	30.975	32.137	31.749	60.2607	61.339	60.9789	30	2.00869	2.04463	2.03263	20.0869	20.4463	203.263
takhob	gallic acid	2251.51	2239.77	2256.3	2120.7	2109.81	2125.15	30	70.6899	70.3269	70.8383	706.899	703.269	7083.83
takhobpa	gallic acid	15.829	15.91	16.017	46.2067	46.2819	46.3812	30	1.54022	1.54273	1.54604	15.4022	15.4273	154.604
mao	gallic acid	111.105	111.062	111.012	134.614	134.574	134.527	30	4.48712	4.48579	4.48424	44.8712	44.8579	448.424
wa 15	gallic acid	436.74	436.201	436.212	436.771	436.271	436.281	15	29.1181	29.0847	29.0854	291.181	290.847	2908.54
malod	kaemferol	60.715	52.061	29.964	7.49359	6.30189	3.25902	30	0.249786	0.210063	0.108634	2.49786	2.10063	10.8634
matad	kaemferol	97.402	108.417	114.896	12.5456	14.0624	14.9546	30	0.418186	0.468746	0.498486	4.18186	4.68746	49.8486
chan	kaemferol	87.198	95.078	42.404	11.1404	12.2255	4.97207	30	0.371348	0.407518	0.165736	3.71348	4.07518	16.5736
gangpla	kaemferol	45.526	49.702	25.926	5.40199	5.97704	2.70297	30	0.180066	0.199235	0.090099	1.80066	1.99235	9.0099
khui	kaemferol	21.608	27.116	26.644	2.10836	2.86684	2.80184	30	0.0702787	0.0955613	0.0933947	0.702787	0.955613	9.33947
mapud	kaemferol	174.136	187.617	189.702	23.1122	24.9686	25.2557	30	0.770408	0.832288	0.841858	7.70408	8.32288	84.1858
mm	kaemferol	7.794	6.867	7	0.206103	0.0784505	0.0967653	30	0.0068701	0.00261502	0.00322551	0.068701	0.0261502	0.322551
pikul	kaemferol	2.796	2.736	2.671	-0.482147	-0.490409	-0.49936	30	-0.0160716	-0.016347	-0.0166453	-0.160716	-0.16347	-1.66453
malod	kaemferol	60.715	52.061	56.115	7.49359	6.30189	6.86015	30	0.249786	0.210063	0.228672	2.49786	2.10063	22.8672
takhob	kaemferol	17.756	12.682	12.994	1.57792	0.879205	0.922169	30	0.0525973	0.0293068	0.030739	0.525973	0.293068	3.0739
takhobpa	kaemferol	127.297	127.421	129.085	16.6623	16.6793	16.9085	30	0.555409	0.555978	0.563616	5.55409	5.55978	56.3616
khoi	kaemferol	30.076	30.743	29.567	3.27445	3.3663	3.20435	30	0.109148	0.11221	0.106812	1.09148	1.1221	10.6812
mao	kaemferol	5.831	6.118	6.309	-0.0642118	-0.0246905	0.00161115	30	-0.00214039	-0.000823017	5.3705e-05	-0.0214039	-0.00823017	0.0053705
wa 15	kaemferol	15.286	16.566	17.543	1.23779	1.41405	1.54859	15	0.0825193	0.0942701	0.103239	0.825193	0.942701	10.3239
khui	myricetin	268.444	204.506	272.598	444.678	337.812	451.621	30	14.8226	11.2604	15.054	148.226	112.604	1505.4
mapud	scutell	794.302	789.387	799.415	717.41	712.982	722.017	30	23.9137	23.7661	24.0672	239.137	237.661	2406.72
chammaliang	vitexin	13.196	13.072	13.416	30.1344	29.4033	31.4316	30	1.00448	0.98011	1.04772	10.0448	9.8011	104.772
gangpla	vitexin	229.902	222.201	221.831	1307.88	1262.48	1260.29	30	43.5961	42.0825	42.0098	435.961	420.825	4200.98

## Sheet: table complete
Samples	TFC	TPC	Samples	DPPH IC50 (mg/ml)	FRAP (mg TE/ml)	ABTS (mg/ml)	Alpha-Glucosidase IC50 (mg/ml)	Alpha-amylase IC50 (mg/ml)
A. puncticulatum	0.03 ± 0.02	81.21 ± 0.62	A. puncticulatum	1.16 ± 0.01	169.41 ± 0.69	2.2 ± 0.08	42.76 ±1.08	5.51 ± 0.03
D. indica	0.94 ± 0.14	80.44 ± 0.20	D. indica	0.69 ± 0.01	4.99 ± 0.45	2.24 ± 0.08	62.65 ±1.86	17.90 ± 0.07
D. decandra	0.37 ± 0.5	61.03 ± 0.59	D. decandra	0.11 ± 0.04	6.79 ± 0.09	1.87 ± 0.01	3.96 ± 0.19	28.84 ± 0.05
E. latifolia	0.12 ± 0.01	48.25 ± 0.59	E. latifolia	1.06 ± 0.16	6.96 ± 0.08	4.75 ± 0.07	95.52 ± 0.53	46.60 ± 0.22
F. indica	0.37 ± 0.04	103.53 ± 0.14	F. indica	0.14 ± 0.01	17.23 ± 0.23	0.65 ± 0.01	26.23 ± 0.08	11.38 ± 0.14
G. dulcis	1.06 ± 0.08	52.13 ± 0.38	G. dulcis	0.12 ± 0.01	2.68 ± 0.06	2.13 ± 0.4	12.54 ± 0.28	15.71 ± 0.36
L. fruticosa	0.77 ± 0.05	188.19 ± 0.95	L. fruticosa	0.74 ± 0.02	19.45 ± 0.81	0.50 ± 0.06	5.70 ± 0.20	4.14 ± 0.04
M.s elengi	0.13 ± 0	48.47 ± 0.22	M.s elengi	0.62 ± 0.27	0.91 ± 0.61	1.17 ± 0.06	13.54 ±0.28	7.18 ± 0.02
M. calabura	0.33 ± 0.01	148.63 ± 0.91	M. calabura	0.55 ± 0.005	27.41 ± 0.23	0.61 ± 0.02	3.27 ± 0.82	13.89 ± 0.14
P. reticulatus	0.01 ± 0.02	69.63 ± 0.04	P. reticulatus	0.33 ± 0.04	6.1 ± 0.06	1.42 ± 0.27	30.21 ± 3.29	5.18 ± 0.01
S. asper	0.29 ± 0.01	75.62 ± 0.37	S. asper	0.63 ± 0.25	9.23 ± 0.42	2.26 ± 0.18	60.40 ± 1.23	24.72 ± 0.09
S. cumini	3.55 ± 0.02	980.42 ± 0.89	S. cumini	0.003 ± 0.00	898.63 ± 0.02	0.04 ± 0.003	0.13 ± 0.01	3.91 ± 0.05
S. malaccense	0.36 ± 0.11	235.98 ± 0.41	S. malaccense	0.21 ± 0.02	484.75 ± 0.66	0.43 ± 0.02	54.43 ±2.06	5.82 ± 0.04
W. edulis	0.07 ± 0.04	59.67 ± 0.44	W. edulis	0.52 ± 0.01	124.93 ± 0.77	2.15 ± 0.02	39.39 ± 1.36	4.88 ± 0.02
S. oleosa	0.38 ± 0.03	84.76 ± 0.55	S. oleosa	0.82 ±0.14	11.29 ± 0.06	2.15 ±0.02	13.42 ±0.34	5.55 ± 0.04

## Sheet: plant list 
Number	Fammily	Scientific name
1	Euphobiaceae	Antidesma puncticulatum
2	Dilleniaceae	Dillenia indica
3	Ebenaceae	Diospyros decandra
4	Elaeagnaceae	Elaeagnus latifolia
5	Salicaceae	Flacourtia indica
6	Clusiaceae	Garcinia dulcis
7	Sapindaceae	Lepisanthes fruticosa
8	Sapotaceae	Mimusops elengi
9	Muntingiaceae	Muntingia calabura
10	Euphobiaceae	Phyllanthus reticulatus
11	Moraceae	Streblus asper
12	Myrtaceae	Syzygium cumini
13	Myrtaceae	Syzygium malaccense
14	Apocynaceae	Willughbeia edulis
15	Sapindaceae	Schleichera oleosa
